# Supplementary material for: New Lidocaine-Based Pharmaceutical Cocrystals: Preparation, Characterization, and Influence of the Racemic vs. Enantiopure Coformer on the Physico-Chemical Properties
Source: MDPI journal article supplement (doi:10.3390/pharmaceutics15041102), 2023-03-29
Supplement: s1 [file s1]

# **New Lidocaine-Based Pharmaceutical Cocrystals: Preparation, Characterization and Influence of the Racemic *versus* Enantiopure Coformer on the Physico-chemical Properties**

Panpan Ma<sup>†1</sup>, Balthazar Toussaint<sup>†1,2</sup>, Enrica Angela Roberti<sup>1</sup>, Noémie Scornet<sup>1</sup>, Axel Santos Silva<sup>1</sup>, Luis Castillo Henríquez<sup>1</sup>, Monique Cadasse<sup>3</sup>, Philippe Négrier<sup>4</sup>, Stéphane Massip<sup>5</sup>, Hanh Dufat<sup>6</sup>, Karim Hammad<sup>6</sup>, Cecilia Baraldi<sup>7</sup>, Maria Cristina Gamberini<sup>7</sup>, Cyrille Richard<sup>1</sup>, Stéphane Veessler<sup>8</sup>, Philippe Espeau<sup>1</sup>, Tu Lee<sup>9</sup>, and Yohann Corvis<sup>1,\*</sup>

<sup>1</sup>*Université Paris Cité, CNRS, INSERM, UTCBS, Chemical and Biological Technologies for Health Group (utcbs.u-paris.fr), F-75006 Paris, France.*

<sup>2</sup>*Département recherche et développement pharmaceutique (DRDP), Agence générale des équipements et produits de santé, AP-HP, F-75005 Paris, France.*

<sup>3</sup>*Université Paris Cité, Département Physico-Chimie du Médicament, Unité Pédagogique de Chimie Analytique, Physique et toxicologie, Faculté de Santé, 4 Avenue de l'Observatoire, F-75006 Paris, France.*

<sup>4</sup>*Université de Bordeaux, Laboratoire Ondes et Matière d'Aquitaine, UMR 5798, F-33400 Talence, France.*

<sup>5</sup>*Université de Bordeaux, CNRS, INSERM, IECB, UAR 3033, F-33600 Pessac, France.*

<sup>6</sup>*Université Paris Cité, CiTCoM, UMR CNRS 8038, F-75006 Paris, France.*

<sup>7</sup>*Department of Life Sciences, University of Modena and Reggio Emilia, Modena, Cap 41125, Italy.*

<sup>8</sup>*CNRS, Aix-Marseille Université, CINaM (Centre Interdisciplinaire de Nanosciences de Marseille), Campus de Luminy, F-13288, Marseille cedex 09, France.*

<sup>9</sup>*Department of Chemical and Materials Engineering, National Central University, Taoyuan City 320317, Taiwan (R.O.C.).*

<sup>†</sup>Both authors contributed equally to this research article.

\*Author to whom correspondence should be addressed.

**Table S1.** Torsion angle data for the Lido:LM and Lido:DLM cocrystals

|           | Lido:LM cocrystal |              | Lido:DLM cocrystal     |              |                         |              |
|-----------|-------------------|--------------|------------------------|--------------|-------------------------|--------------|
|           | Atoms             | Angle (deg.) | Atoms                  | Angle (deg.) | Atoms                   | Angle (deg.) |
| Lidocaine | C31-N32-C35-C36   | -71.5(3)     | C12-N13-C14-C15        | -68.2(5)     |                         |              |
|           | C31-N32-C33-C34   | 66.6(3)      | C12-N13-C16-C17        | 68.7(4)      |                         |              |
|           | C29-N28-C25-C20   | 103.0(2)     | C10-N9-C6-C1           | 95.2(4)      |                         |              |
|           | C29-N28-C25-C24   | -76.1(3)     | C10-N9-C6-C5           | -85.6(4)     |                         |              |
| L-menthol |                   |              | Disordered menthol (I) |              | Disordered menthol (II) |              |
|           | C5-C6-C9-C10      | -62.3(2)     | C25-C26-C29-C30        | -78.6(4)     | C45-C46-C49-C50         | -79.1(5)     |
|           | C5-C6-C9-C11      | 62.9(3)      | C25-C26-C29-C31        | 42.2(4)      | C45-C46-C49-C51         | 46.1(5)      |
|           | C1-C6-C9-C10      | 172.75(18)   | C21-C26-C29-C30        | 152.0(3)     | C41-C46-C49-C50         | 153.1(4)     |
|           | C1-C6-C9-C11      | -62.1(3)     | C21-C26-C29-C31        | -87.1(4)     | C41-C46-C49-C51         | -81.7(4)     |

**Table S2.** Hydrogen bond geometry in the Lido:LM (data in bold) and Lido:DLM cocrystals

| H-bond type    | D-H···A | Menthol | Length (Å)   |              |                 | Angle (deg.) |
|----------------|---------|---------|--------------|--------------|-----------------|--------------|
|                |         |         | D-H          | H···A        | D···A           | D-H···A      |
| intermolecular | N-H···O |         | <b>0.870</b> | <b>2.213</b> | <b>3.028(2)</b> | <b>156</b>   |
|                |         | (I)     | 0.870        | 2.240        | 2.997(4)        | 145          |
|                | O-H···O | (II)    | 0.870        | 2.060        | 2.836(5)        | 148          |
|                |         |         | <b>0.830</b> | <b>2.084</b> | <b>2.817(2)</b> | <b>147</b>   |
|                |         | (I)     | 0.830        | 2.060        | 2.749(4)        | 140          |
|                |         | (II)    | 0.830        | 1.940        | 2.754(5)        | 167          |
| intramolecular | N-H···N |         | <b>0.870</b> | <b>2.309</b> | <b>2.731(2)</b> | <b>110</b>   |
|                |         |         | 0.870        | 2.300        | 2.721(3)        | 110          |

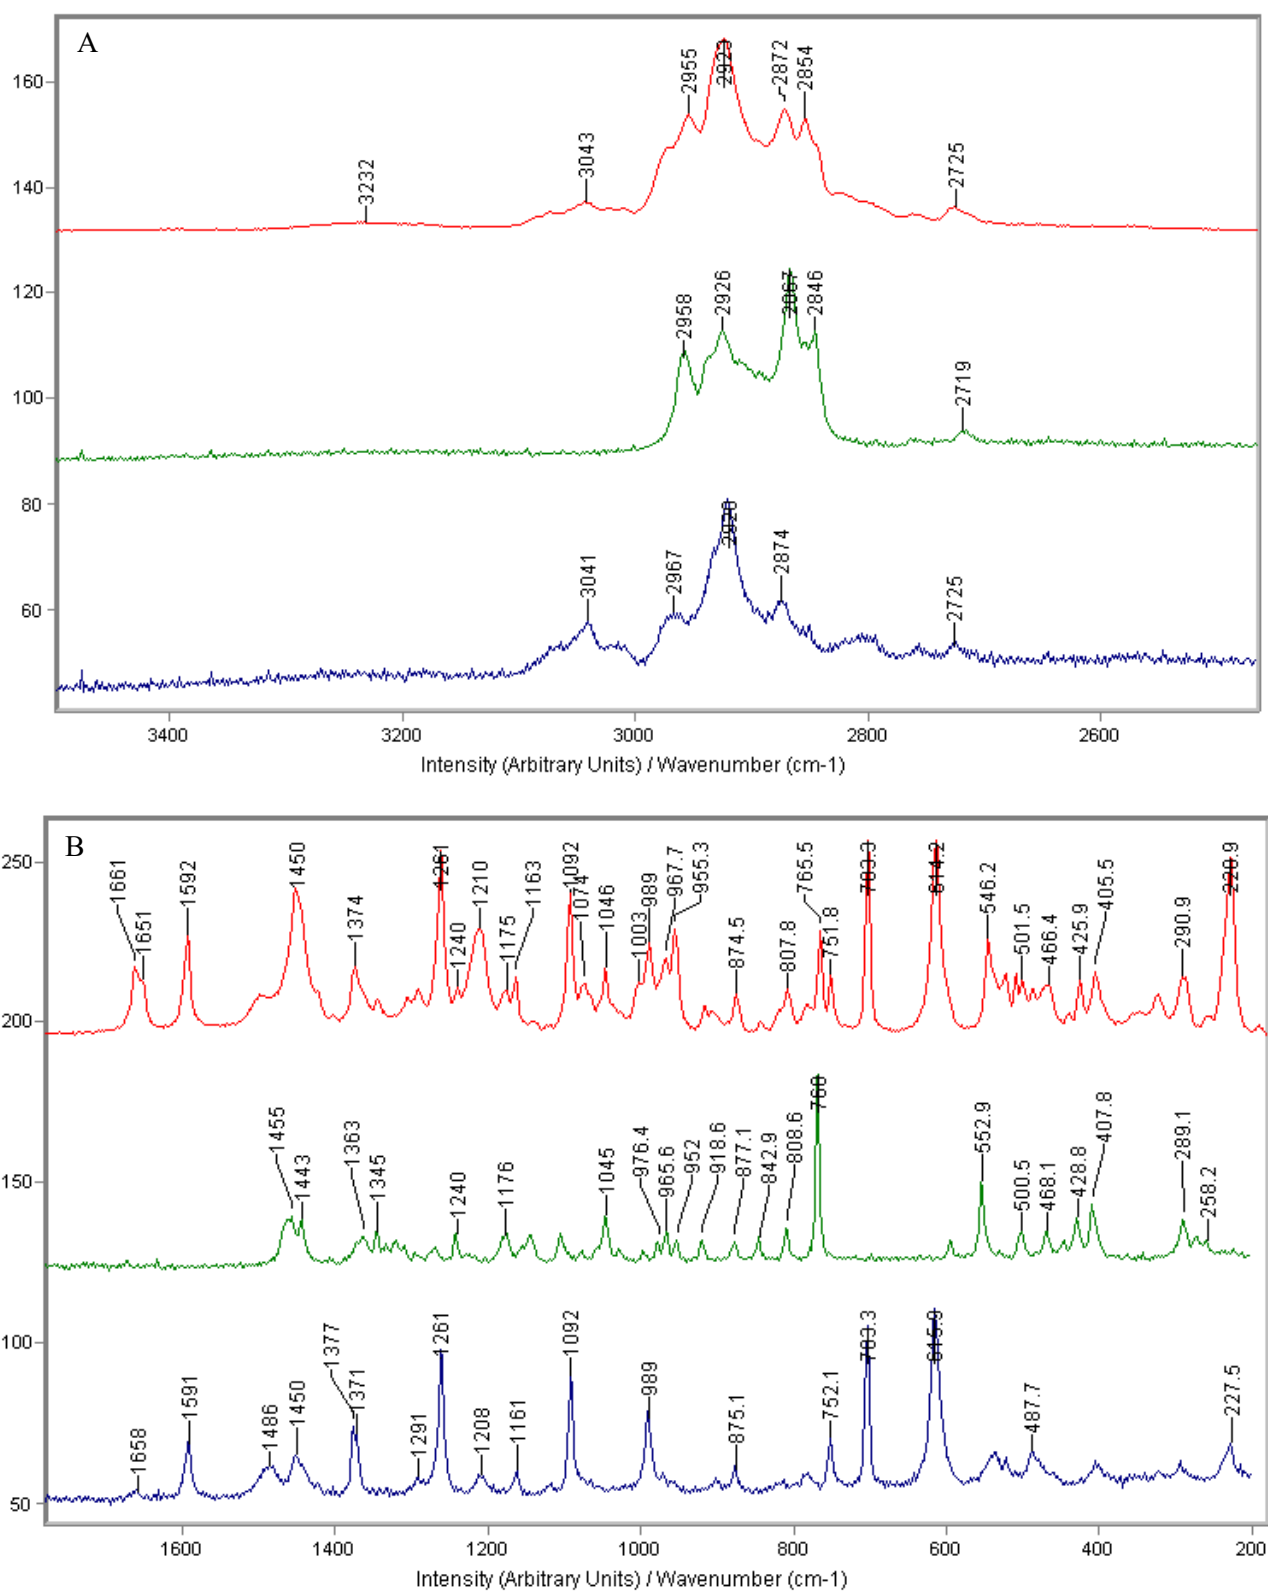

**Figure S1.** Raman spectra obtained in the 3500-2400 cm<sup>-1</sup> (A) and 1700-200 cm<sup>-1</sup> wavenumbers range (B). Color code: (Red) Lido:DLM cocrystal, (green) pure DL-menthol, and (blue) lidocaine.

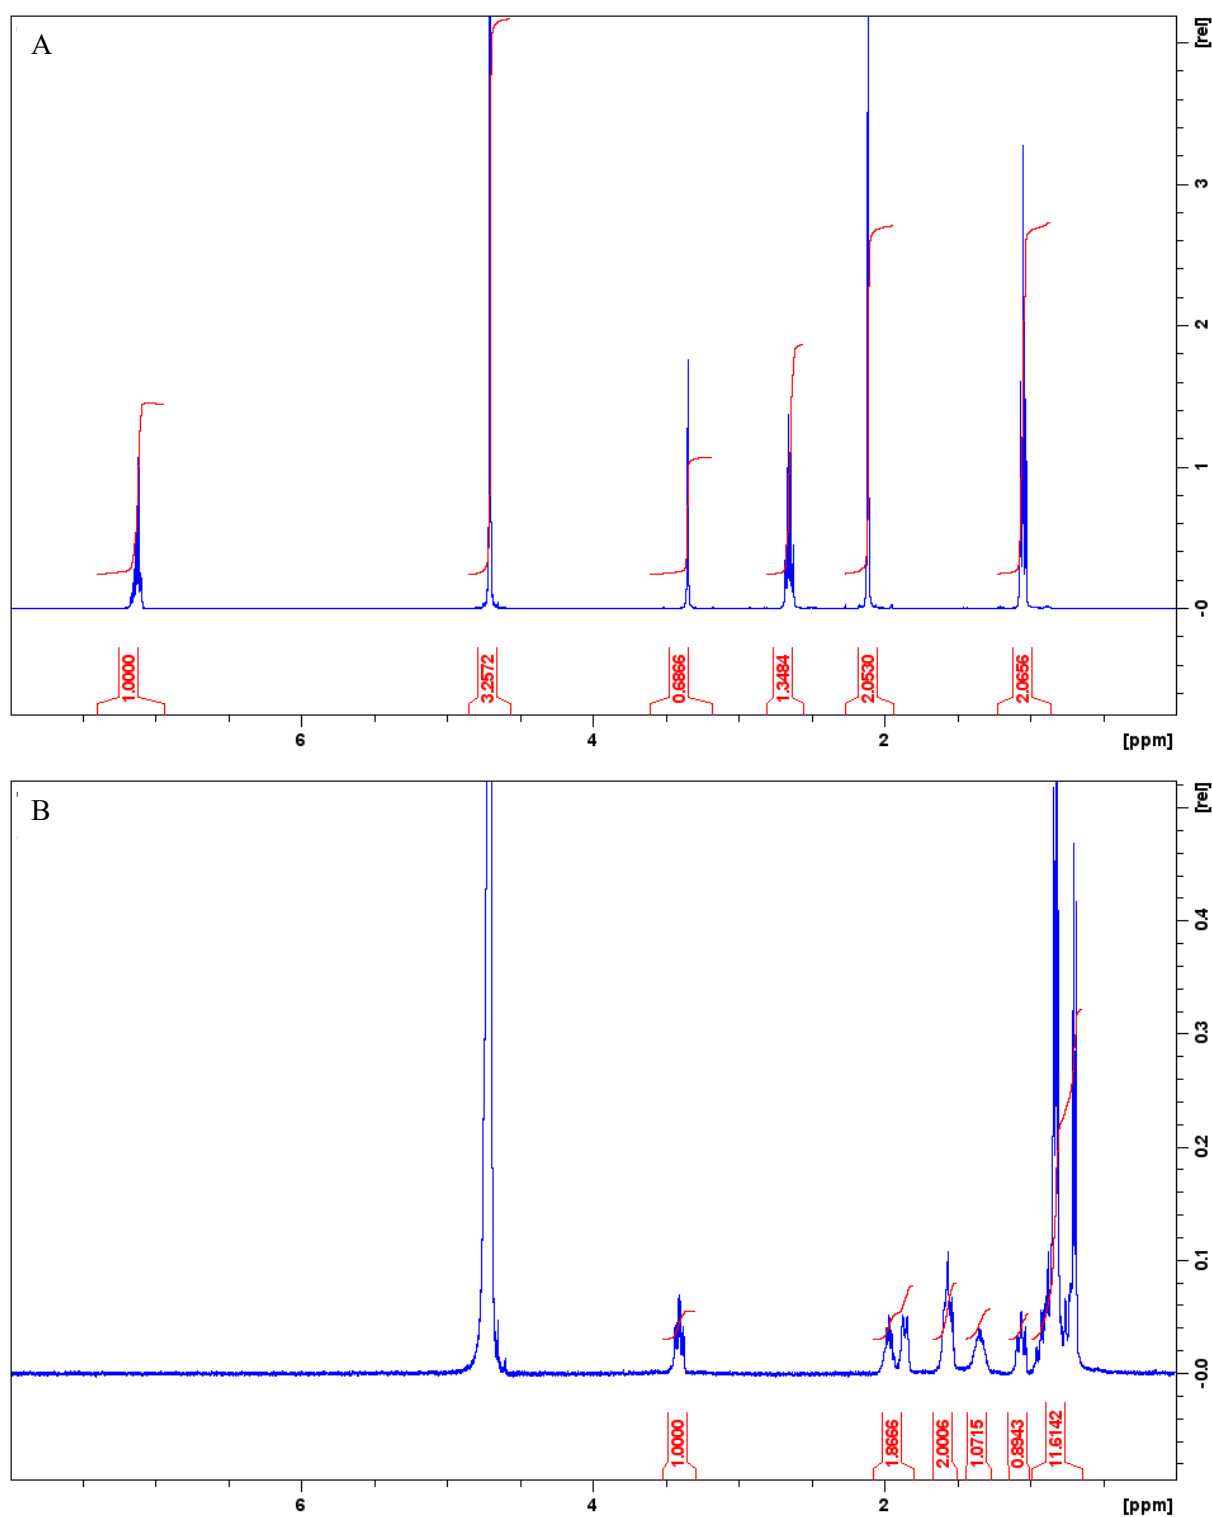

**Figure S2.**  $^1\text{H}$  NMR spectrum of pure lidocaine (A) and menthol (B) dissolved in  $\text{D}_2\text{O}$ .

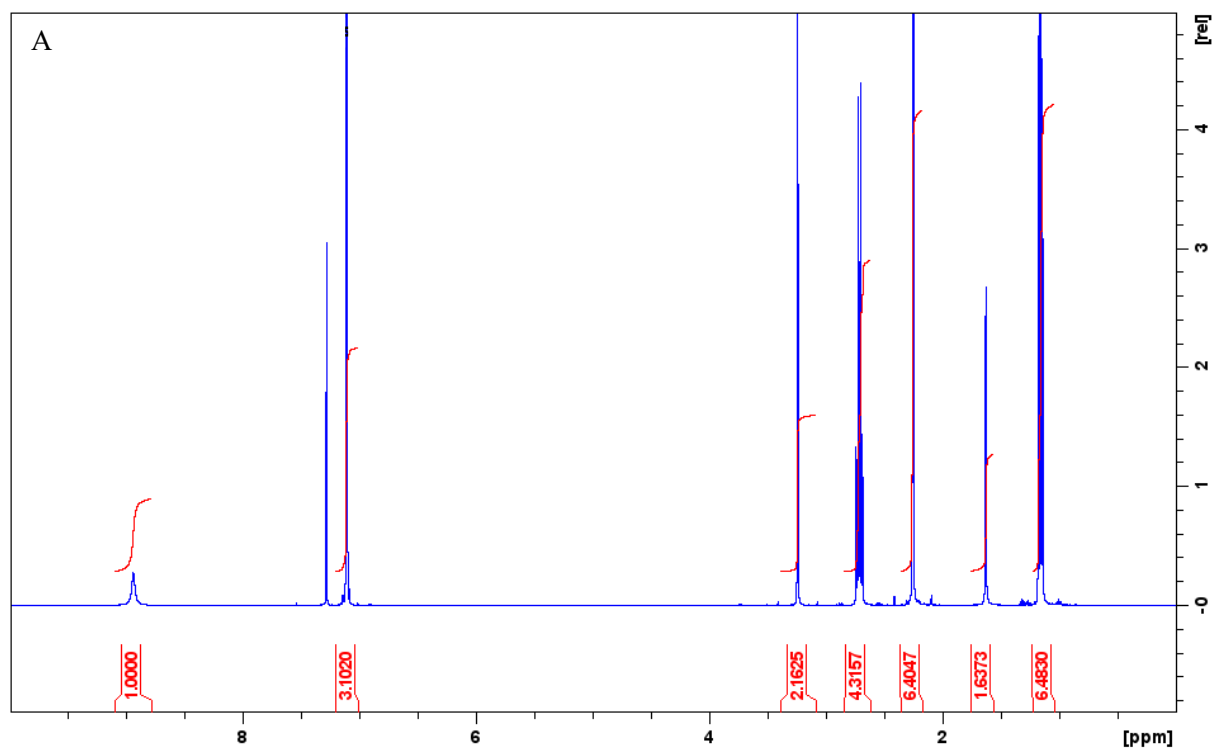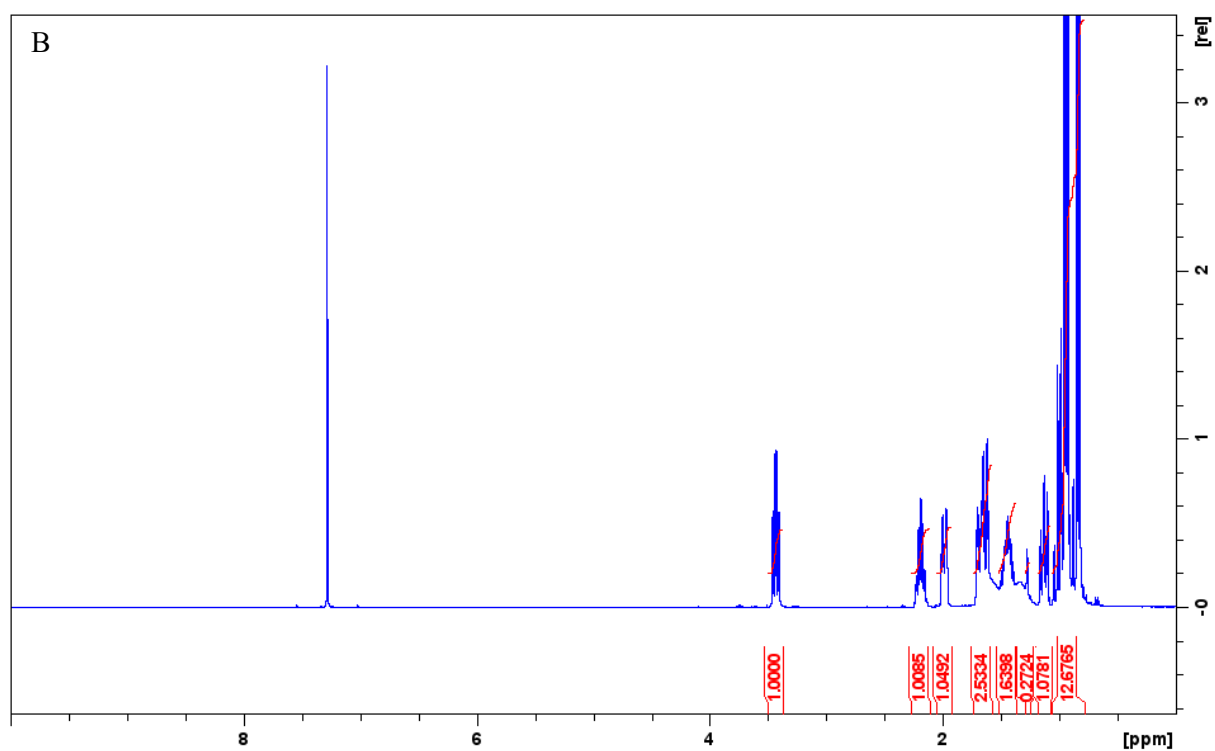

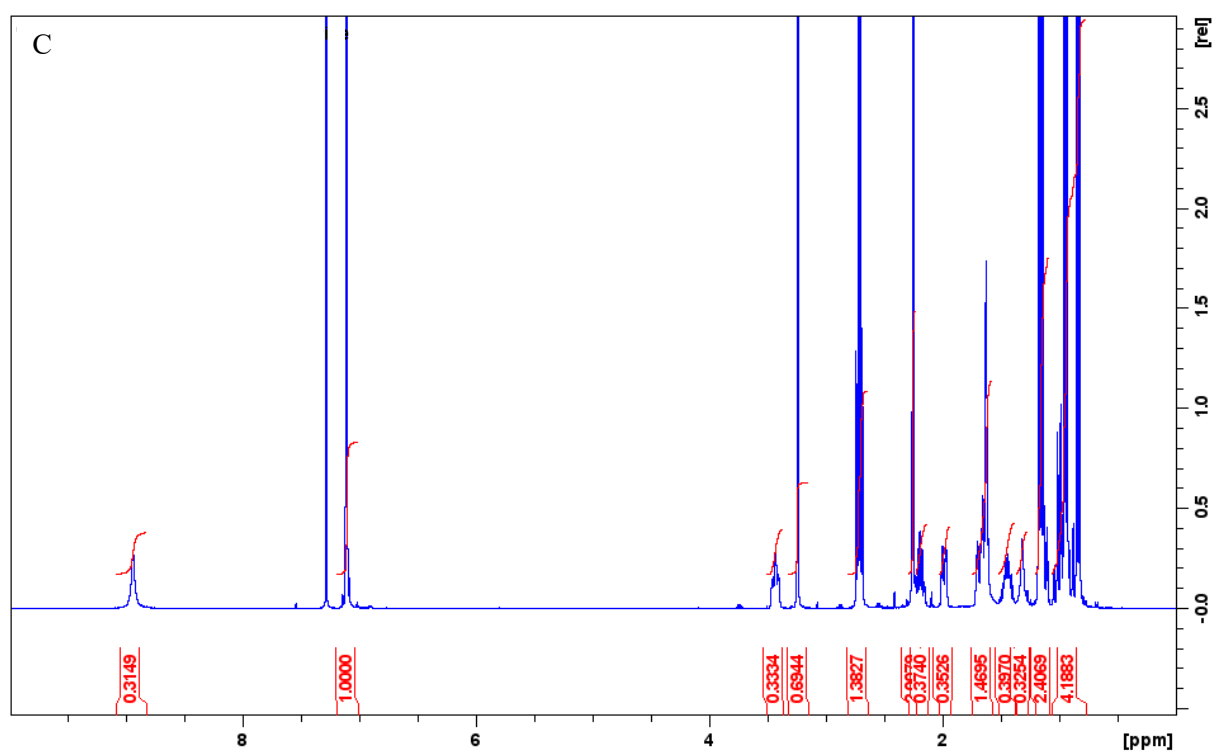

**Figure S3.**  $^1\text{H}$  NMR spectrum of pure lidocaine (A) and DL-menthol (B), as well as the Lido:DLM cocrystal (C) dissolved in  $\text{CDCl}_3$ .

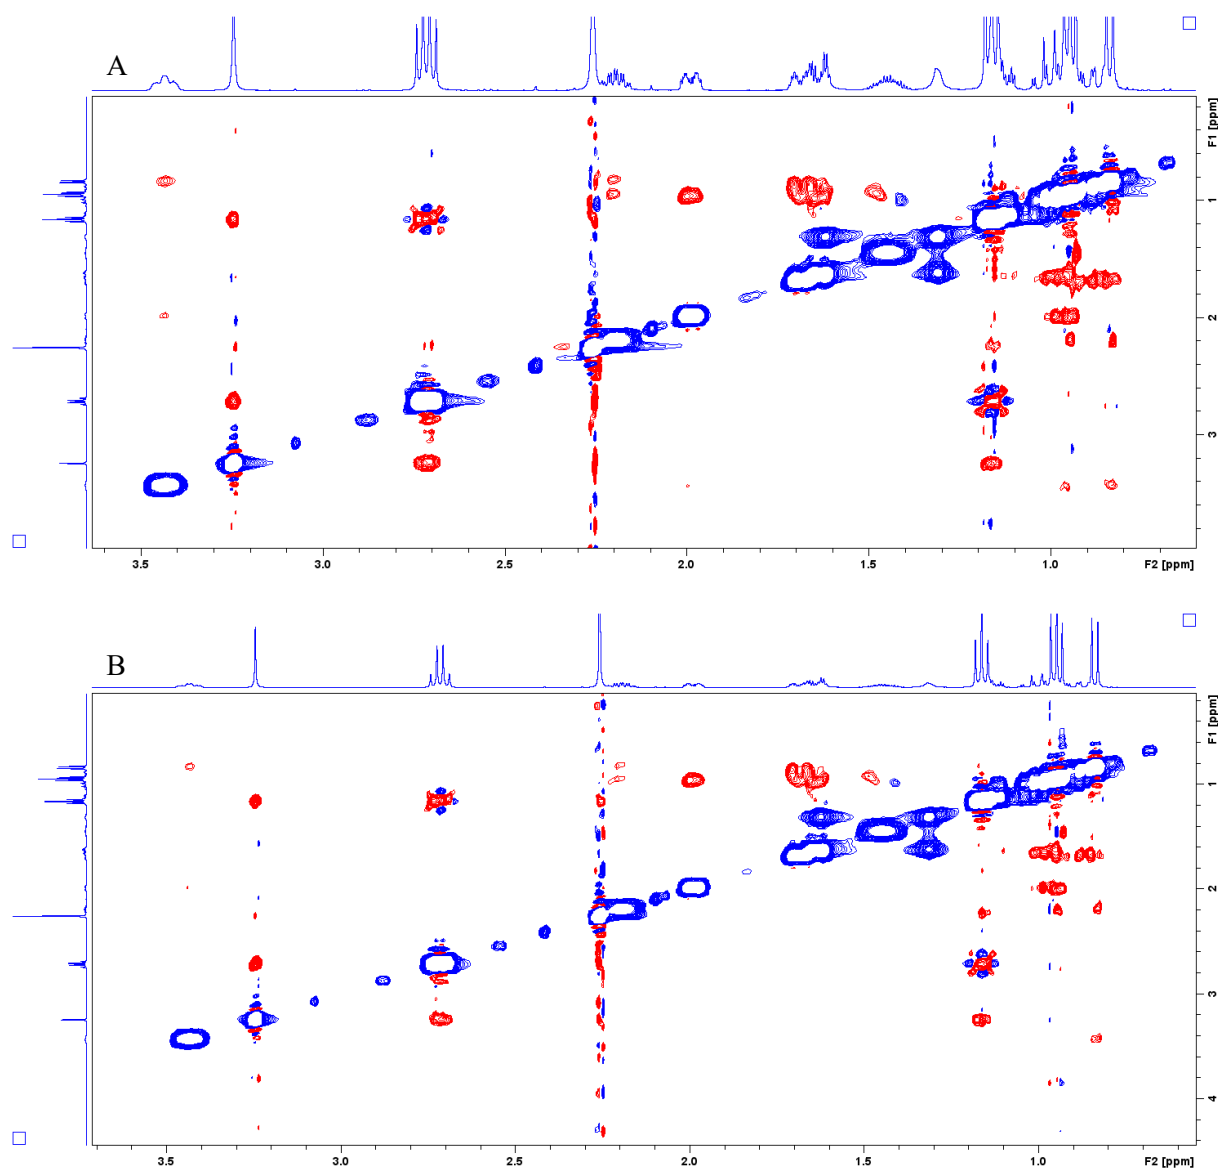

**Figure S4.** <sup>1</sup>H NMR 2D NOESY spectrum of Lido:DLM cocrystal (A) and the mixture of lidocaine and DL-menthol at the same molar ratio (B) dissolved in CDCl<sub>3</sub>.

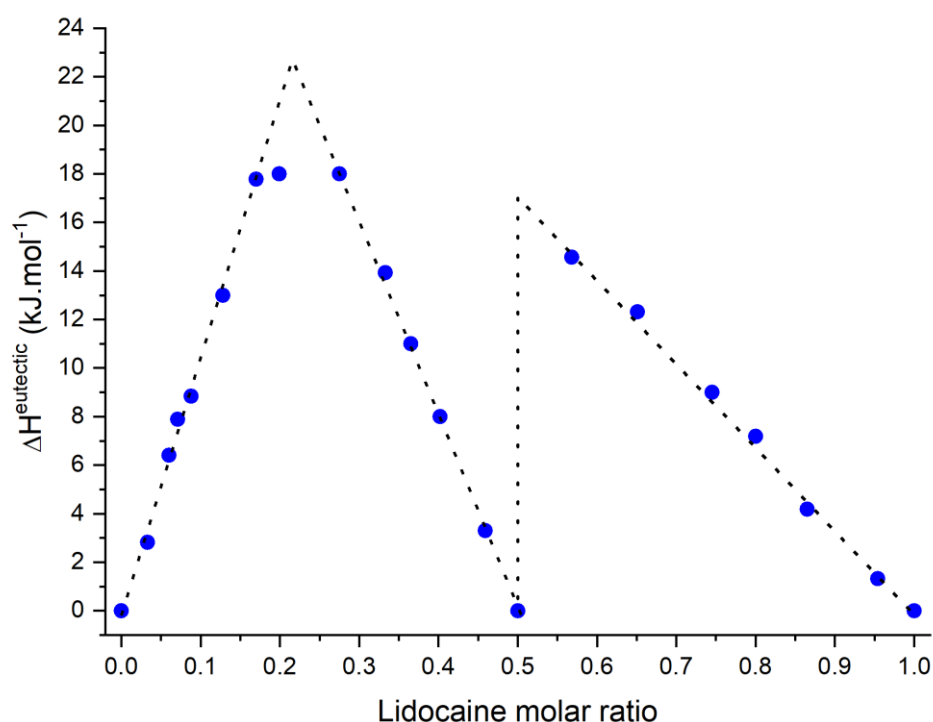

**Figure S5.** Tammann plots established from the eutectic equilibrium data of the stable lidocaine/DL-menthol phase diagram.

**Table S3.** Melting point and heat of fusion of the Lido:DLM and Lido:LM cocrystals as a function of the time of exposition in air at room temperature, *ca.* 20 °C

| Annealing time at rt (h) | Lido:DLM              |                                                       | Lido:LM               |                                                       |
|--------------------------|-----------------------|-------------------------------------------------------|-----------------------|-------------------------------------------------------|
|                          | $T_{\text{fus}}$ (°C) | $\Delta_{\text{fus}}H$ (kJ per mol of pure component) | $T_{\text{fus}}$ (°C) | $\Delta_{\text{fus}}H$ (kJ per mol of pure component) |
| 0                        | 38.7                  | 37.7                                                  | 32.0                  | 29.0                                                  |
| 63                       | 39.0                  | 38.0                                                  | 32.7                  | 29.1                                                  |
| 147                      | 38.9                  | 37.9                                                  | 32.7                  | 29.3                                                  |
| 201                      | 39.1                  | 38.0                                                  | 32.4                  | 29.1                                                  |
| Mean value               | 38.9                  | 37.9                                                  | 32.5                  | 29.1                                                  |
| Standard deviation       | 0.2                   | 0.1                                                   | 0.3                   | 0.1                                                   |
